# Supplementary material for: Noninvasive urinary protein signatures associated with colorectal cancer diagnosis and metastasis
Source: PubMed Central journal article supplement (PMC9119985; doi:10.1038/s41467-022-30391-8), 2022-05-19
Supplement: 41467_2022_30391_MOESM1_ESM.pdf [file 41467_2022_30391_MOESM1_ESM.pdf]

## Supplementary Information

### Noninvasive urinary protein signatures associated with colorectal cancer diagnosis and metastasis

Yulin Sun<sup>1</sup>, Zhengguang Guo<sup>2</sup>, Xiaoyan Liu<sup>2</sup>, Lijun Yang<sup>1</sup>, Zongpan Jing<sup>1</sup>, Meng Cai<sup>1</sup>, Zhaoxu Zheng<sup>3</sup>, Chen Shao<sup>4</sup>, Yefan Zhang<sup>5</sup>, Haidan Sun<sup>2</sup>, Li Wang<sup>6</sup>, Minjie Wang<sup>6</sup>, Jun Li<sup>1</sup>, Lusong Tian<sup>1</sup>, Yue Han<sup>7</sup>, Shuangmei Zou<sup>8</sup>, Jiajia Gao<sup>1</sup>, Yan Zhao<sup>1</sup>, Peng Nan<sup>1</sup>, Xiufeng Xie<sup>1</sup>, Fang Liu<sup>1</sup>, Lanping Zhou<sup>1</sup>, Wei Sun<sup>2\*</sup> & Xiaohang Zhao<sup>1\*</sup>

<sup>1</sup>State Key Laboratory of Molecular Oncology, National Cancer Center/National Clinical Research Center for Cancer/Cancer Hospital, Chinese Academy of Medical Sciences and Peking Union Medical College, Beijing, China.

<sup>2</sup>Core Facility of Instruments, Institute of Basic Medical Sciences, Chinese Academy of Medical Sciences and Peking Union Medical College, Beijing, China.

<sup>3</sup>Department of Colorectal Surgery, National Cancer Center/National Clinical Research Center for Cancer/Cancer Hospital, Chinese Academy of Medical Sciences and Peking Union Medical College, Beijing, China.

<sup>4</sup>State Key Laboratory of Proteomics, Beijing Proteome Research Center, National Center for Protein Sciences (Beijing), Beijing Institute of Lifeomics, Beijing, China.

<sup>5</sup>Department of Hepatobiliary Surgery, National Cancer Center/National Clinical Research Center for Cancer/Cancer Hospital, Chinese Academy of Medical Science and Peking Union Medical College, Beijing, China.

<sup>6</sup>Department of Clinical Laboratory, National Cancer Center/National Clinical Research Center for Cancer/Cancer Hospital, Chinese Academy of Medical Sciences and Peking Union Medical College, Beijing, China.

<sup>7</sup>Department of Interventional Therapies, National Cancer Center/Cancer Hospital, Chinese Academy of Medical Sciences and Peking Union Medical College, Beijing, China.

<sup>8</sup>Department of Pathology, National Cancer Center/Cancer Hospital, Chinese Academy of Medical Sciences and Peking Union Medical College, Beijing, China.

\*Correspondence should be addressed to W.S. (sunwei@ibms.pumc.edu.cn) and X.Z. (zhaoxh@cicams.ac.cn).

### Supplementary Figures:

**Supplementary Figure 1.** Quantitative urinary proteomics analysis in CRC at the discovery stage.

**Supplementary Figure 2.** The generation of the CRC urinary protein biomarker signature.

**Supplementary Figure 3.** Independent verification of the urinary protein signature using dot blot analysis for clinical samples.

**Supplementary Figure 4.** Immunohistochemical analysis of CORO1C, RAD23B and ARPC5 expression in normal and precancerous lesions of CRC.

**Supplementary Figure 5.** Urinary levels of CORO1C, RAD23B, ARPC5, GSPT2, and NDN in urological tumors.

**Supplementary Tables:**

**Supplementary Table 1.** Summary of performance of the biomarkers for CRC diagnosis in PRM verification.

**Supplementary Table 2.** Summary of performance of the biomarkers for CRC metastasis in PRM validation.

**Supplementary Table 3.** Summary of performance of the biomarkers for CRC diagnosis in immunoassay verification.

**Supplementary Table 4.** Summary of performance of the biomarkers for CRC metastasis in immunoassay verification.

**Supplementary Table 5.** Summary of the biomarkers for CRC diagnosis performance with 95% specificity in immunoassay verification.

**Supplementary Table 6.** Summary of the biomarkers for CRC metastasis predictive performance with 95% specificity in immunoassay verification.

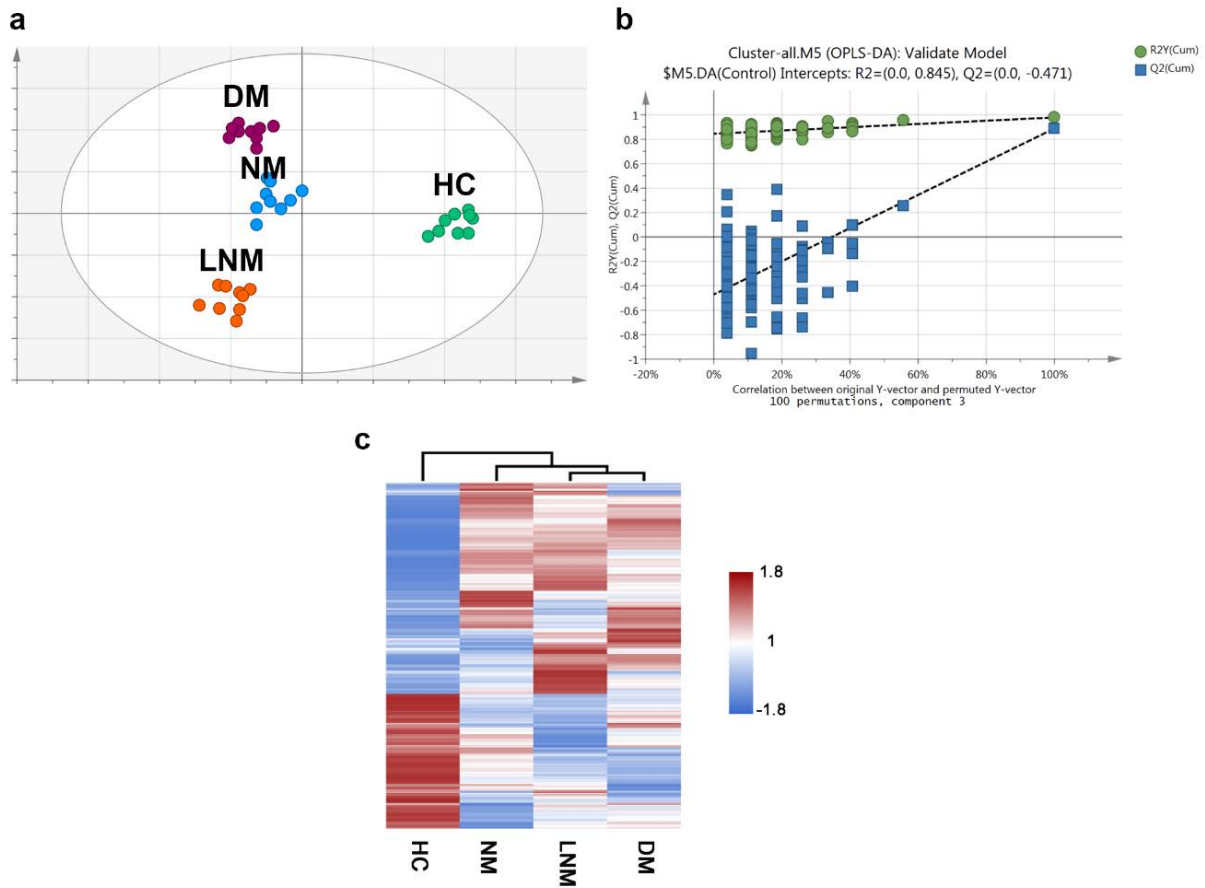

**Supplementary Figure 1. Quantitative urinary proteomics analysis in CRC at the discovery stage.** (a) Score plot of orthogonal partial least squares discriminant analysis (OPLS-DA) model among the four groups. (b) One hundred permutation validations of the OPLS-DA model based on the proteome of the four groups. (c) Relative abundance of differential proteins among the four groups by unsupervised clustering.

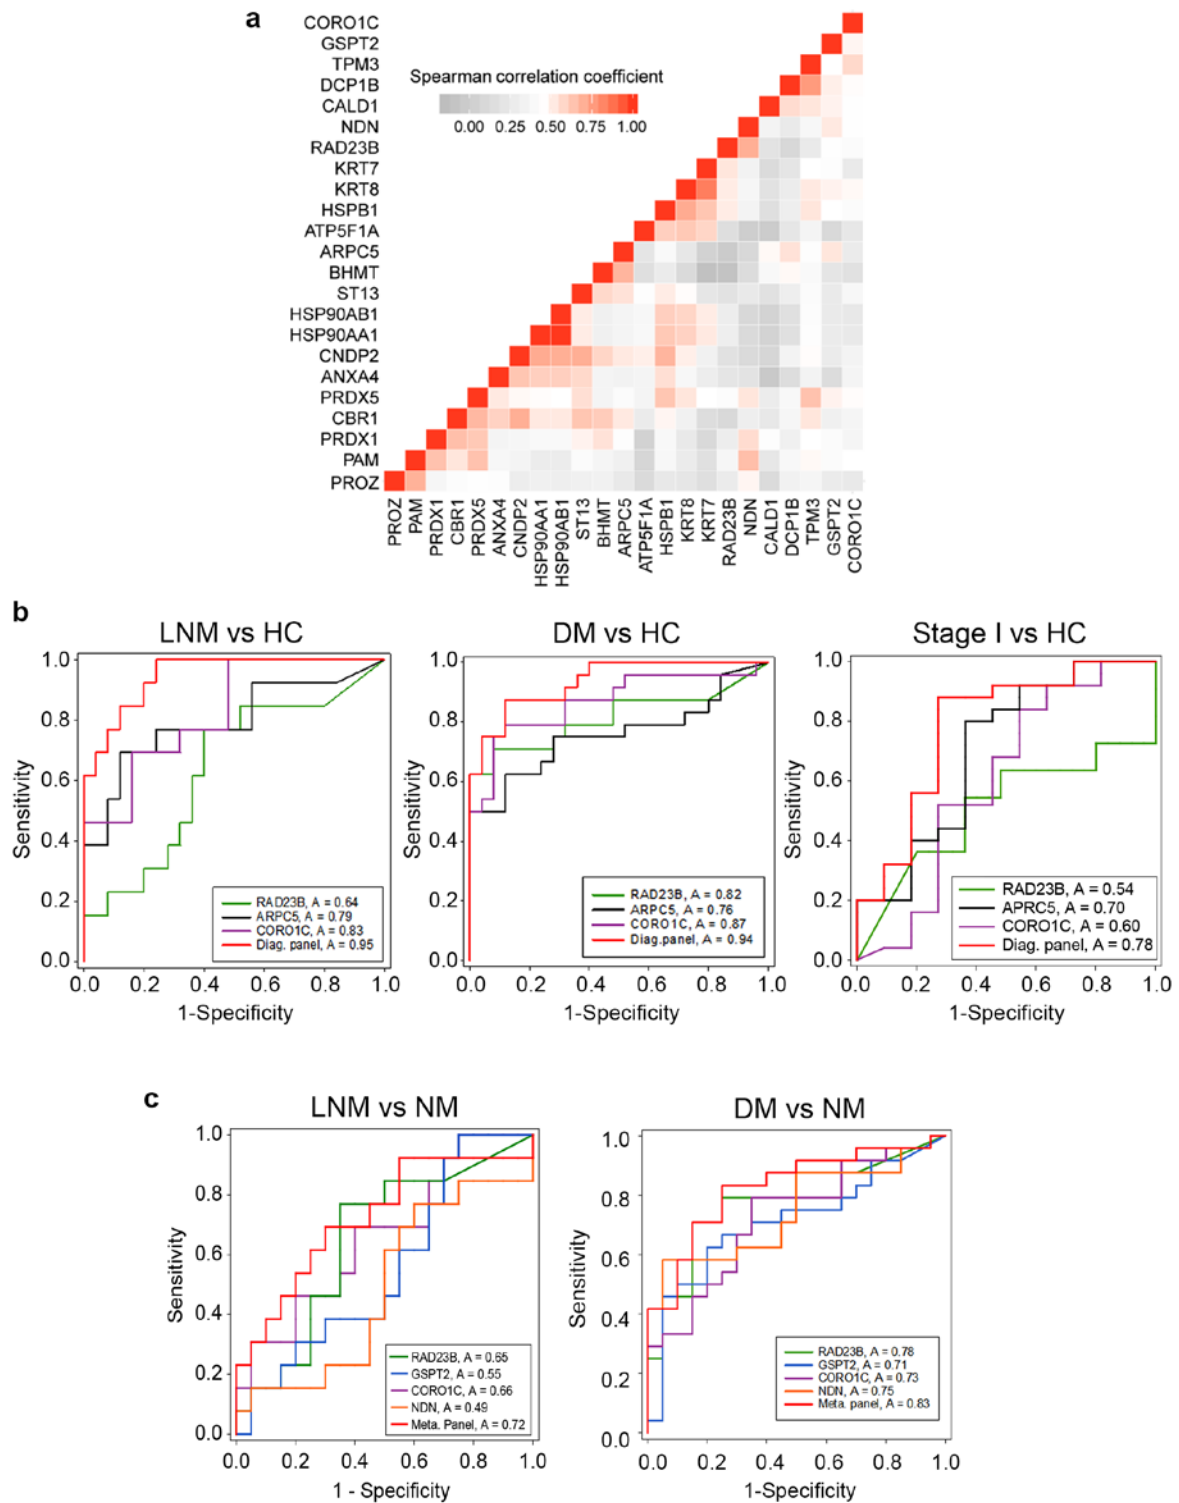

**Supplementary Figure 2. The generation of the CRC urinary protein biomarker signature.** (a) The correlation matrix plot of 23 upregulated proteins in CRC patients based on PRM data. (b) ROC curve analysis was conducted by the diagnostic biomarkers to discriminate the HC group from LNM, DM groups and stage I group. (c) ROC curve analysis was conducted by the metastatic biomarkers to discriminate the NM group from LNM or DM groups.

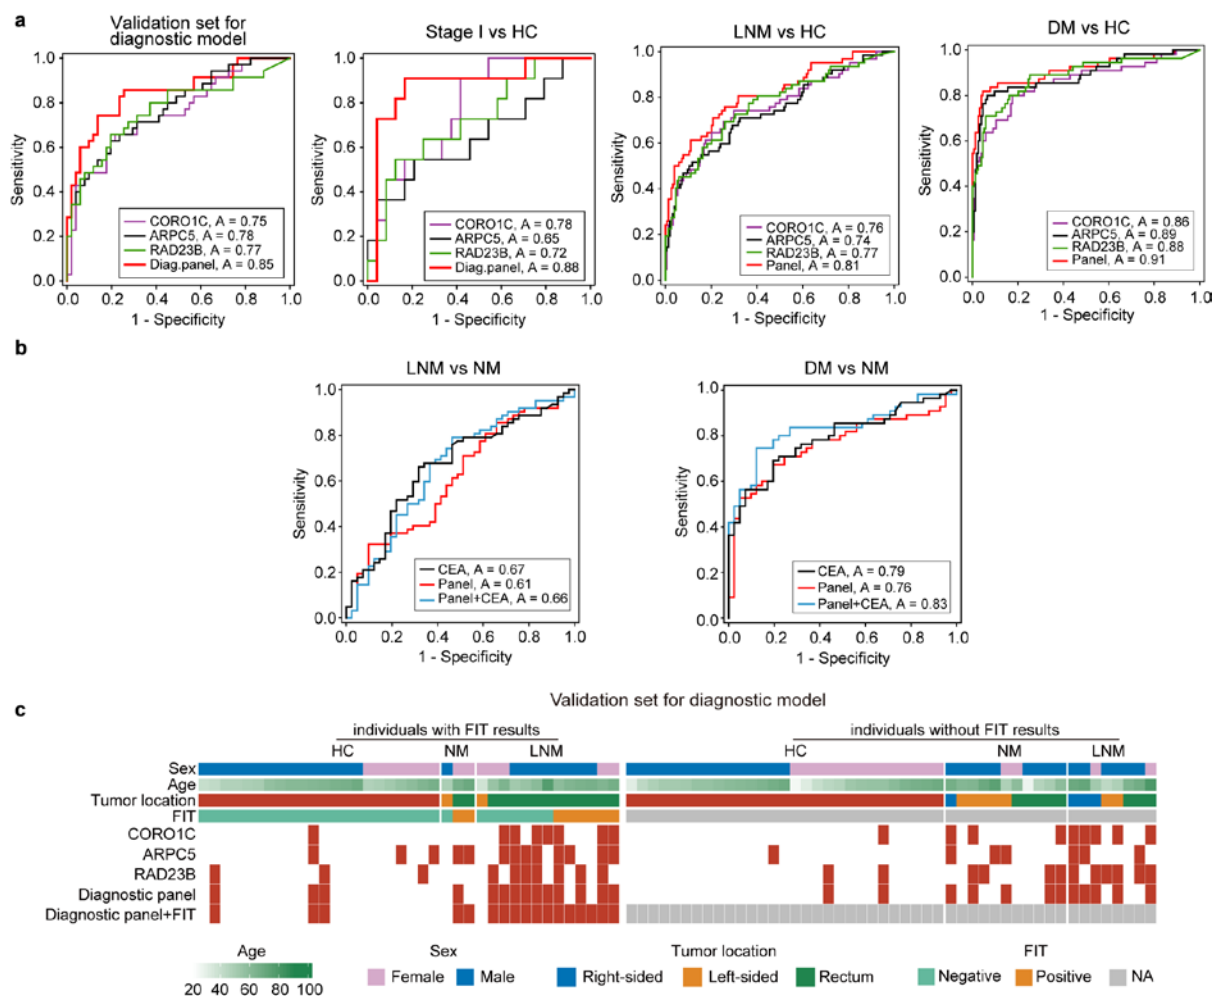

**Supplementary Figure 3. Independent verification of the urinary protein signature using dot blot analysis in clinical samples.** (a) ROC curve of the diagnostic panel and the single markers for the diagnostic model in the validation set, and discrimination between LNM group, DM group or stage I group and HC group. (b) ROC curve of serum CEA, the metastatic panel and the combination of the metastatic panel and CEA for the metastatic model showing the discrimination between the LNM group or DM group and NM group. (c) Heatmap of the dot plot data for single urinary markers as well as the diagnostic panel, and the combination of FIT test for the diagnostic model in the validation samples with a specificity of 95%. Red: positive using the cutoff value with a specificity of 95%. The FIT test, tumor location, sex and age are indicated by color coding (right side). NA, not available.

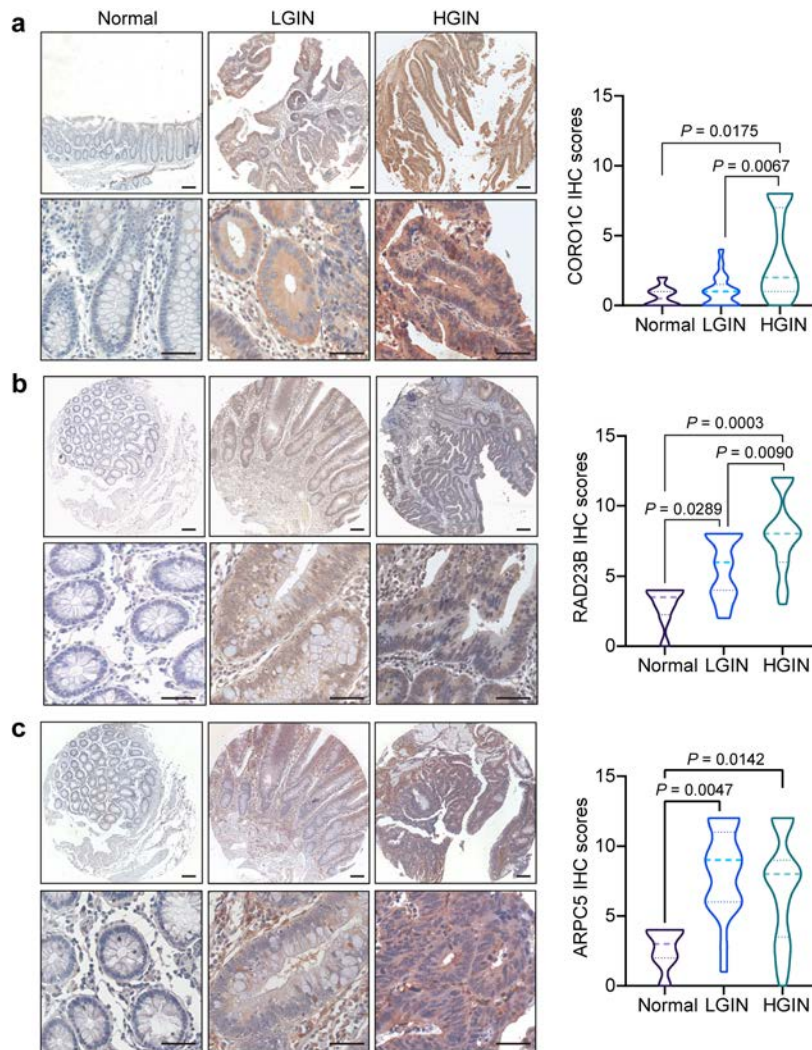

**Supplementary Figure 4. Immunohistochemical analysis of CORO1C, RAD23B and ARPC5 expression in normal and precancerous lesions of CRC.** Representative immunohistochemistry images and staining scores distribution of CORO1C (a), RAD23B (b) and ARPC5 (c) expression in normal colorectal mucosa, low-grade intraepithelial neoplasia (LGIN) and high-grade intraepithelial neoplasia (HGIN). The differences between groups for each marker were analyzed by Kruskal-Wallis test followed by a Dunn's multiple comparisons test. The median and quartile values in each group of individuals are shown as thick dotted lines and thin dotted lines, respectively. Scale bar: upper panel, 200  $\mu\text{m}$ ; bottom panel, 50  $\mu\text{m}$ .

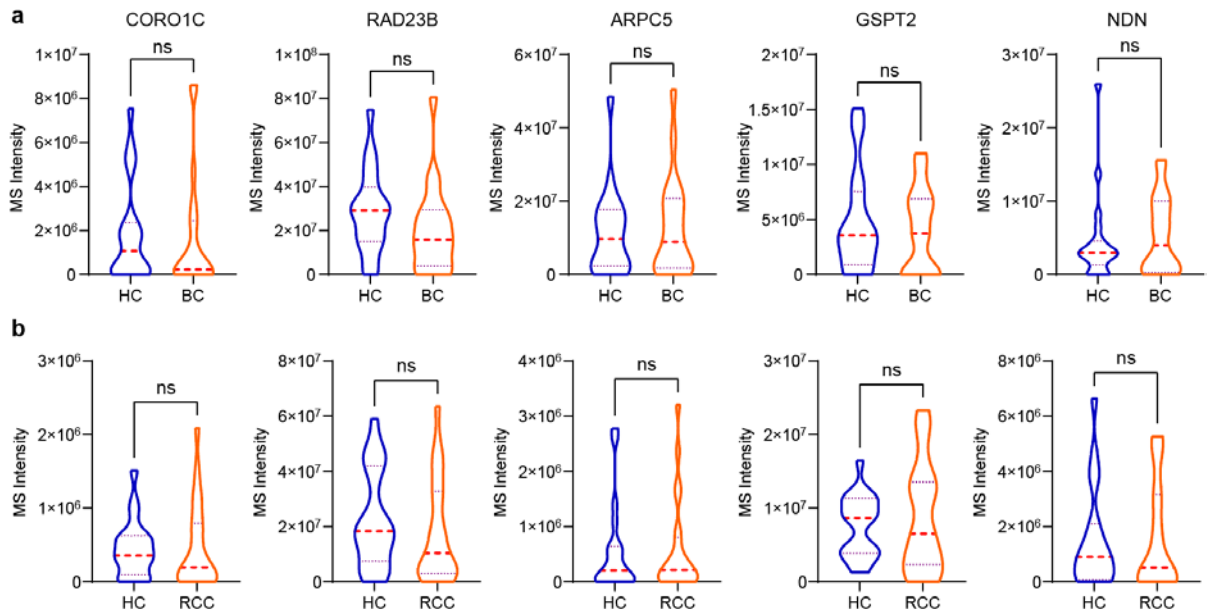

**Supplementary Figure 5. Urinary levels of CORO1C, RAD23B, ARPC5, GSPT2, and NDN in urological tumors.** The urine samples of patients with bladder cancer (a) and renal cell carcinoma (b) as well as their respective sex- and age-matched healthy controls were measured using a PRM targeted proteomic strategy. The median and quartile values in each group of individuals are shown as thick red dash lines and thin purple dotted lines, respectively. The two-sided Mann-Whitney rank test was used to compare the difference between two groups. HC, healthy controls; BC, bladder cancer; RCC, renal cell carcinoma; ns, not significant.

**Supplementary Table 1.** Summary of performance of the biomarkers for CRC diagnosis in PRM verification stage.

|                  | CRC-NM vs. HC | CRC-LNM vs. HC | CRC-DM vs. HC | Stage I vs. HC | CRC diagnosis (CRC NM+LNM vs. HC) |
|------------------|---------------|----------------|---------------|----------------|-----------------------------------|
| CORO1C           | 0.671         | 0.828          | 0.868         | 0.602          | 0.733                             |
| APRC5            | 0.724         | 0.794          | 0.758         | 0.702          | 0.752                             |
| RAD23B           | 0.488         | 0.637          | 0.816         | 0.538          | 0.547                             |
| Diagnostic panel | 0.800         | 0.948          | 0.935         | 0.782          | 0.858                             |

**Supplementary Table 2.** Summary of performance of the biomarkers for CRC metastasis in PRM validation.

|                  | CRC-LNM vs CRC-NM | CRC-DM vs CRC-NM | CRC metastasis (CRC metastasis vs CRC non-metastasis) |
|------------------|-------------------|------------------|-------------------------------------------------------|
| CORO1C           | 0.662             | 0.725            | 0.703                                                 |
| RAD23B           | 0.650             | 0.783            | 0.736                                                 |
| GSPT2            | 0.554             | 0.710            | 0.655                                                 |
| NDN              | 0.488             | 0.748            | 0.657                                                 |
| Metastatic panel | 0.723             | 0.827            | 0.784                                                 |

**Supplementary Table 3.** Summary of performance of the biomarkers for CRC diagnosis in immunoassay verification.

|                  | Training |       | Validation   |                   |               |              | Training    |             | Validation  |             |
|------------------|----------|-------|--------------|-------------------|---------------|--------------|-------------|-------------|-------------|-------------|
|                  | AUC      | AUC   | NM vs HC AUC | Stage I vs HC AUC | LNM vs HC AUC | DM vs HC AUC | Sensitivity | Specificity | Sensitivity | Specificity |
| CORO1C           | 0.733    | 0.753 | 0.713        | 0.777             | 0.755         | 0.857        | 0.647       | 0.777       | 0.657       | 0.784       |
| ARPC5            | 0.697    | 0.776 | 0.695        | 0.652             | 0.741         | 0.889        | 0.632       | 0.718       | 0.629       | 0.804       |
| RAD23B           | 0.728    | 0.766 | 0.702        | 0.723             | 0.767         | 0.883        | 0.676       | 0.699       | 0.657       | 0.804       |
| Diagnostic panel | 0.787    | 0.846 | 0.796        | 0.879             | 0.814         | 0.913        | 0.691       | 0.796       | 0.743       | 0.863       |

**Supplementary Table 4.** Summary of performance of the biomarkers for CRC metastasis in immunoassay verification.

|                        | LNM+DM vs. NM |             |             | LNM vs NM | DM vs NM |
|------------------------|---------------|-------------|-------------|-----------|----------|
|                        | AUC           | Sensitivity | Specificity | AUC       | AUC      |
| CORO1C                 | 0.635         | 0.521       | 0.781       | 0.566     | 0.713    |
| RAD23B                 | 0.652         | 0.769       | 0.488       | 0.573     | 0.742    |
| GSPT2                  | 0.670         | 0.282       | 0.976       | 0.598     | 0.750    |
| NDN                    | 0.632         | 0.658       | 0.610       | 0.558     | 0.716    |
| CEA ( $\geq 5$ ng/ml)  | NA            | 0.581       | 0.780       | NA        | NA       |
| Metastatic panel       | 0.699         | 0.667       | 0.683       | 0.610     | 0.764    |
| Metastatic panel + CEA | 0.739         | 0.709       | 0.732       | 0.659     | 0.831    |

NA, not available.



**Supplementary Table 5.** Summary of the biomarkers for CRC diagnosis performance with 95% specificity in immunoassay verification.

|                  | Training    |             | Validation  |             |
|------------------|-------------|-------------|-------------|-------------|
|                  | Sensitivity | Specificity | Sensitivity | Specificity |
| CORO1C           | 0.182       | 0.941       | 0.312       | 0.954       |
| ARPC5            | 0.424       | 0.941       | 0.625       | 0.864       |
| RAD23B           | 0.454       | 0.941       | 0.5         | 0.818       |
| Diagnostic panel | 0.515       | 0.941       | 0.75        | 0.818       |
| FIT              | 0.667       | 1.000       | 0.500       | 1.000       |
| Panel +FIT       | 0.818       | 0.941       | 0.938       | 0.864       |

**Supplementary Table 6.** Summary of the biomarkers for CRC metastasis predictive performance with 95% specificity in immunoassay verification.

|                               | Sensitivity | Specificity |
|-------------------------------|-------------|-------------|
| CORO1C                        | 0.137       | 0.951       |
| RAD23B                        | 0.299       | 0.951       |
| GSPT2                         | 0.291       | 0.951       |
| NDN                           | 0.085       | 0.951       |
| Metastatic panel              | 0.376       | 0.951       |
| CEA ( $\geq 5$ ng/ml)         | 0.581       | 0.78        |
| Panel + CEA ( $\geq 5$ ng/ml) | 0.718       | 0.756       |
